# Supplementary material for: ABCG1 contributes to suberin formation in Arabidopsis thaliana roots
Source: PubMed Central journal article supplement (PMC6684660; doi:10.1038/s41598-019-47916-9), 2019-08-06
Supplement: 41598_2019_47916_MOESM1_ESM.pdf [file 41598_2019_47916_MOESM1_ESM.pdf]

## Supplementary Information

ABCG1 contributes to suberin formation in

*Arabidopsis thaliana* roots

*Kalpana Shanmugarajah*<sup>1,4</sup>, *Nicole Linka*<sup>2</sup>, *Katharina Gräfe*<sup>1,4</sup>, *Sander H.J. Smits*<sup>1</sup>,  
*Andreas P.M. Weber*<sup>2,4</sup>, *Jürgen Zeier*<sup>3,4</sup> and *Lutz Schmitt*<sup>1,4\*</sup>

<sup>1</sup>Institute of Biochemistry, Heinrich-Heine University, Düsseldorf, Germany

<sup>2</sup>Institute of Plant Biochemistry, Heinrich-Heine University Düsseldorf, Germany

<sup>3</sup>Institute for Molecular Ecophysiology of Plants, Heinrich-Heine University, Düsseldorf,  
Germany

<sup>4</sup>Cluster of Excellence on Plant Sciences (CEPLAS), Heinrich-Heine University,  
Düsseldorf, Germany

\* For correspondence

[lutz.schmitt@hhu.de](mailto:lutz.schmitt@hhu.de)

```

PhABCg1 -----
StABCg1 MSRIVAENMLQGGENVQFYDQRVQQAMEMSQASAYSSPTLGGMLKRVGDVVRKEVTGDETP
AtABCg1 MARIV-----AANDDDSMELNTISSIHDSITLGLLKNVSDVRKMAIGDETP

PhABCg1 -----MTNQLPNKVELAEVVPQNGGVFLTWEDLWVTA
StABCg1 VHRILMSDTQSISSHSLPFVLSFNLLTYSVKVRRKMSFPAILRQPAAGVSTG---DPVAG
AtABCg1 VHESLNQDYND-GYMRTPFVLSFDNLTYNVSVREKLFDRNFLPFR---RTE--DPEIA
. . : * : : : . : *

PhABCg1
StABCg1
AtABCg1
Walker A
SSVKDGSKAILKGLTGYAMPGELLAINGPSGSGKSTLDDTIAGRLGSSSTRQSGDILINGR
ENLFTNTKFLNNSISGEARDGEIVAVLGSASGSGKSTLIDALANRIAKESL-KGTITLNGE
QTARPKTKTLLNNSISGETRDGEIMAVLGSASGSGKSTLIDALANRIAKGSL-KGTVTKLNGE
. . : * : : : * : * : : : * : * : : : * : * : : : * : * : : : * : * : : *

PhABCg1
StABCg1
AtABCg1
Q-Loop
R--QTLAYGSSAYVVDLTLATLTIKEAVYSAELQLPNSMSKSEKKEIADVTLKMGML
PLDSRLLKVISAYVMDLLYPMLTVEETLMFAAEFRLPRSLSKSKKMRVQALIDQLGL
TLQSRMLKVISAYVMDLLFPMLTVEETLMFAAEFRLPRSLPKSKKLRVQALIDQLGI
. : * * * * * * * * * * * : : : : : * : * * * * . . . : : * :

PhABCg1
StABCg1
AtABCg1
ABC Signature Walker B
QDAMETRIGGWSGKTSGGQRRVSIACLEILTRPKLFLFDEPTSGLDSAASYVMKAIAS
RNAAKTIIGDEGHRVSGGEARRVSIIGIDIHDPILFLFDEPTSGLDSTSAYMVVKVLRQ
RNAAKTIIGDEGHRVSGGEARRVSIIGIDIHDPILFLFDEPTSGLDSTSAFVVVKVLRK
: : * * * * . : * : * : * : * : * : * : * : * : * : * : * : * : * : *

PhABCg1
StABCg1
AtABCg1
H-Loop
QCQ-GRTIIASIDPSVDVFLFHSCLLSSGRTRYFPGPASAANEFALSGFPCTLQNP
IAQSGSIVIMSIDPSYRILGLLDRMLFLSRGQTVYSGSPMNLPHFFSDFGHPIDSEN
IAQSGSIVIMSIDPSHRVLGLLDRILFLSRGHTVYSGSPASLPRFFTEFGSPIPENENR
. * * * * * * * * * * : : . : : * * * * * * * * * * * * * * * *

PhABCg1
StABCg1
AtABCg1
SDHFLKTINSDFDQDIEEGSTRRKSTEEVIDILIKSYKASDKYNAVQSQVA-----
TEFALDLIRE----LEGSPPGTKSLVEF---NKTWENTKRSNE-NPEIQ---TPTHGL
TEFALDLIRE----LEGSAGTRGLIEF---NKKWQEMKKQSNRQPPLTPPSSPYNLF
: : . * . * . . : * . . . . * . * : : : : * : : . : : : :

PhABCg1
StABCg1
AtABCg1
-----EICQQEGEM-----LDKRSHASFITQSLVLTTRRSFINMSR
SLKEAISASISRGKLVSGTTSDIHTS-----PASMVPTYANPFWIEMLVLSKRFSFTNSWR
TLKEAIAAISIRGKLVSGGESVAHGGATTNTTTLAVPAFANPMWIEIKTLSKRSMNLSRR
. . * : : : : : : : : : : : : : : : * : * : * : *

PhABCg1
StABCg1
AtABCg1
DLGYWLRRLAVYVVIIVGLGSLYDVGFSAAASVQARGSMFMFVASFITFMAIGGFPSFVE
VPELFGIRLGAIVVTGFILATMFWQLDDSPKGVQERLGFFAFAMSTFFYTCADALPVFLQ
QPELFGIRIASVVTGFILATVFWRLDNSPKGVQERLGFFAFAMSTFFYTCADALPVFLQ
: : : . * : . . * : : : : : . * . * * * : : * . * : . . . * * :

PhABCg1
StABCg1
AtABCg1
DMKVFQREKLNHYGSGSFVIANLTSAMPYLLLVSLIPGAIAYFMTGLQNGFEHFIFYFAL
ERYIFMRETAYNAYRRSSYCLSHAIVSLPALIFLSFAFAAITFWAVGLVGGFSGFLFYFA
ERYIFMRETAYNAYRRSSYVLSHAIVSFPFLIFLVAFAATTYWAVALDGLLGLLGFYCL
: : * * . . * : : : : : : : * : * : * : * : * : : : * * : * :

PhABCg1
StABCg1
AtABCg1
VLFTCMMLIVESLMMIVASMPVNFMLGLIAGAGIQALMLLSSGFFRFLPNDLPKPFWKYPLH
IILASFWAGNSFVTFLSGVVPSVMLGYTIVVAILAYFLLFSGFFINRDRIP-PYWIW-FH
IILASFWGSSFVTFLSGVVPSVMLGYTIVVAILAYFLLFSGFFINRNRIP-DYWIW-FH
: : : : : . : : : : * : : : * . . * * * * * : : * : * : * :

PhABCg1
StABCg1
AtABCg1
YVAFHKYAYEGMFKNEFEGLEKIHVDVNGEDILRNTW-----
YLSLVKYPYEAVLQNEFDATKCFVKGIQLEFDNSPLGNVPNALKEKLLSMTSNTLNKAIT
YMSLVKYPYEAVLQNEFSDATKCFVQVQIFDNTPLGELPEVMKLLKLLGTVSKSLGVTIS
* : : * * * : : : * : . . * * : : : * :

PhABCg1
StABCg1
AtABCg1
-----QNMNDYSKWIDLVIILLGMLVLYRVFLLVVVKAGEIVKPAIRAFMSH
SSTCVTTGADILVQQGITDLKWNCLWITIAWGFFFRVLFYFSLGSKNKRR-----
STTCLTTGSDILRQQGVVQLSKWNCLFITVAFGFFFRILFYFTLLGSKNKRR-----
* : * * * * * : . . : : : * : : : : * . *

PhABCg1
StABCg1
AtABCg1
SPNQINSAERPLDVFDS
-----
-----

```

**Figure S 1: Sequence alignment of ABCG1 from *A. thaliana*, *S. tuberosum* and *P. hybrida*.** A sequence alignment of AtABCG1 with StABCG1 and PhABCg1 was created using the CLUSTALW program with default settings. The NBD (nucleotide binding domains) is highlighted in blue and the TMD (transmembrane domain) in orange. Conserved amino acids are highlighted in red and conserved motifs marked with a box. Sequence identity of AtABCG1 and StABCG1: 74.15%. Sequence identity of AtABCG1 and PhABCg1: 30.63%. Sequence identity of StABCG1 and PhABCg1: 31.82%.

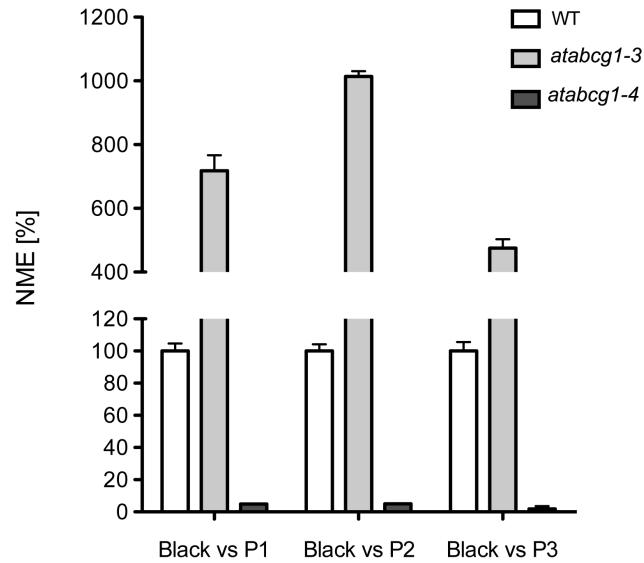

**Figure S 2: qRT-PCR of T-DNA insertional *atabcg1* mutant lines.** Relative mRNA transcript level of AtABCG1 in *atabcg1-3* and *atabcg1-4* was analyzed by qRT-PCR. P1-P3, primer pairs 1-3 bind downstream of the T-DNA; Black, Type 2A phosphatase interacting protein 41 (TIP41)-like reference gene (At4g34270) <sup>1</sup>. The *AtABCG1* transcript-level in *atabcg1-3* is decreased in comparison to the wild type (WT) up to 95 %, while *atabcg1-4* shows a 5- to 10-fold increase. The increased transcript-level in *atabcg1-4* is likely due to a inside the T-DNA region located promotor that causes a strong expression of the 3' end of the *AtABCG1* mRNA. A functional protein cannot be produced due to the interruption of the coding region by T-DNA <sup>2</sup>.

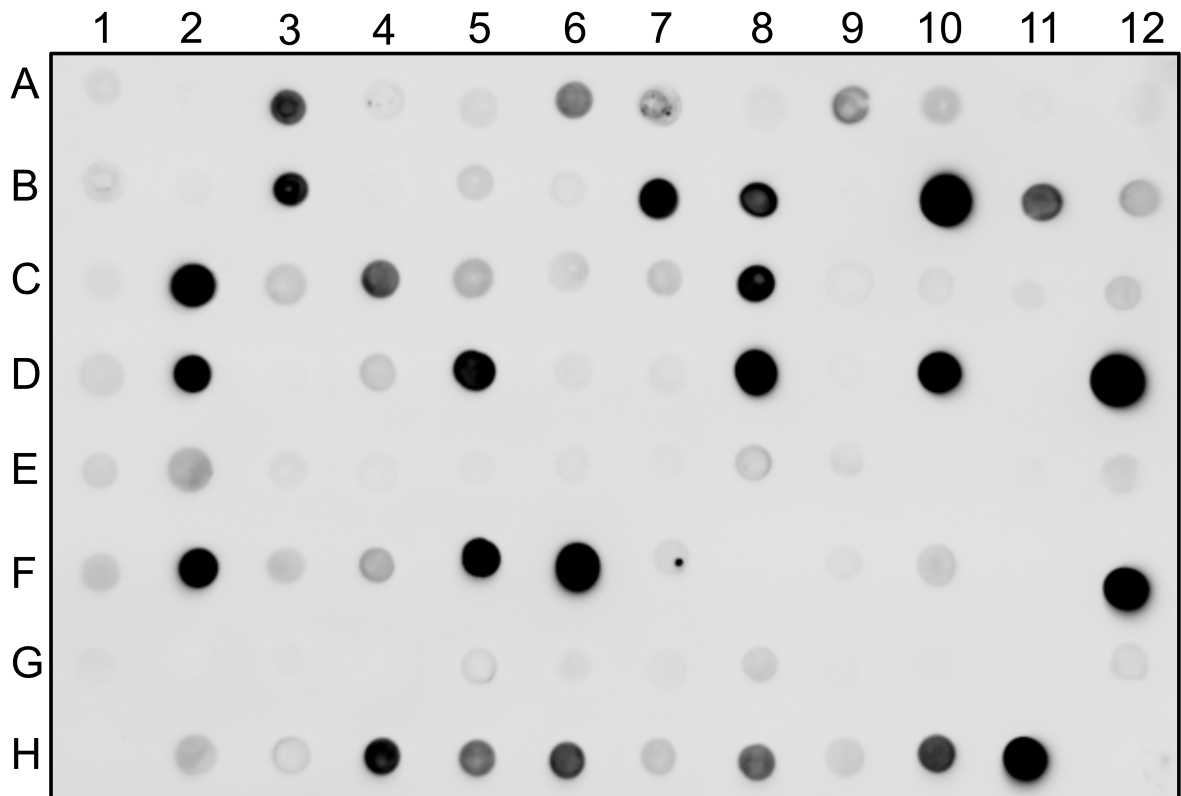

**Figure S 3: Solubilization screen of AtABCG1 using Dot Blot technique.** AtABCG1 containing *P. pastoris* crude membranes were solubilized with 95 different detergents. The solubilized protein was spotted on a nitrocellulose membrane and analyzed by subsequent immunoblotting (anti-His-tag antibody) for solubilization efficiency. List of used detergents and concentrations can be found in Table S 3. The color of the immunoblot was inverted without contrast change.

**A****1-Hexadecanol (C16:0)**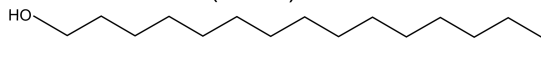**1-Eicosanol (C20:0)**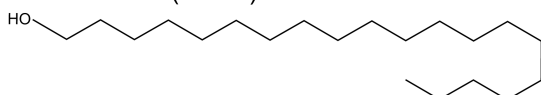**1-Tetracosanol (C24:0)**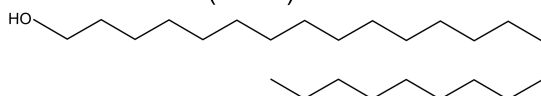**1-Octacosanol (C28:0)**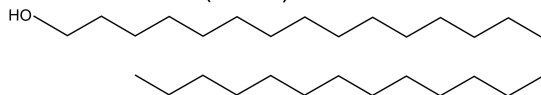**1-Octadecanol (C18:0)**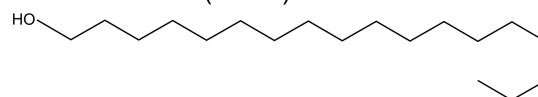**1-Docosanol (C22:0)**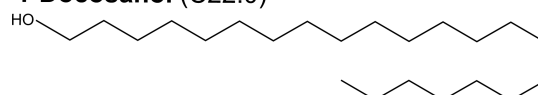**1-Hexacosanol (C26:0)**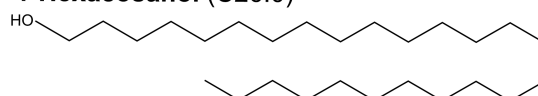**1-Triacontanol (C30:0)**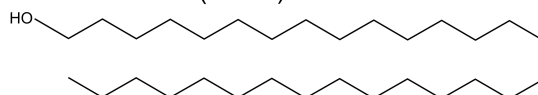**B****Hexadecanoic acid (C16:0)**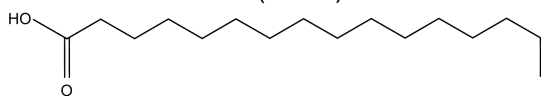**Eicosanoic acid (C20:0)**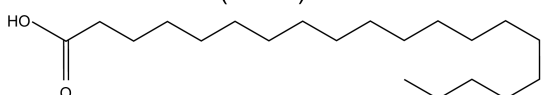**Hexacosanoic acid (C26:0)**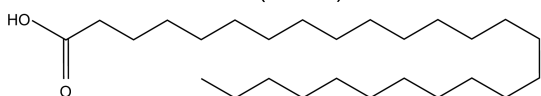**Triacontanoic acid (C30:0)**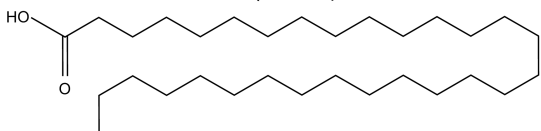**Octadecanoic acid (C18:0)**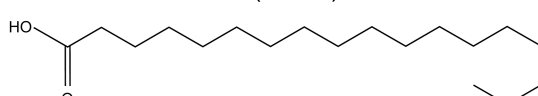**Tetracosanoic acid (C24:0)**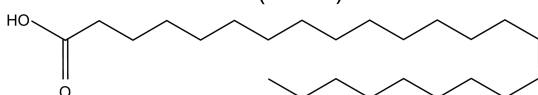**Octacosanoic acid (C28:0)**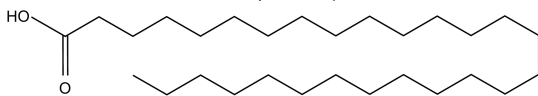

**Figure S 4: Structures of substrates used in this study.** A, fatty alcohols with chain length of C 16:0 to C 30:0. B, fatty acids with chain length of C 16:0 to C 20:0 and C 24:0 to C 30:0. Created with Chemdraw 16.0.

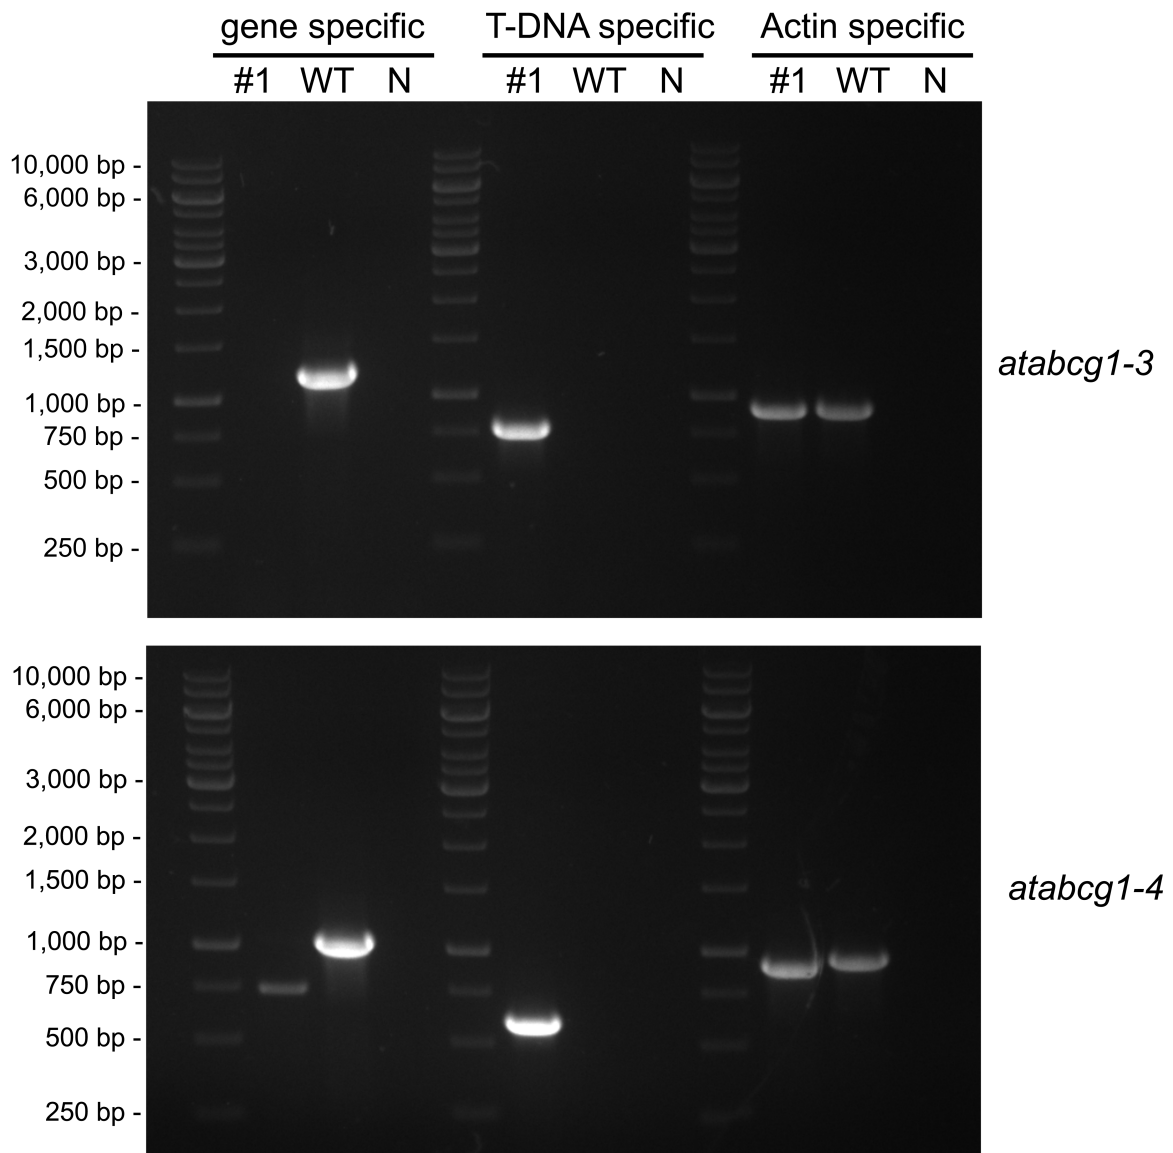

**Figure S 5: Genetic analysis of the *atabcg1* mutant lines *atabcg1-3* and *atabcg1-4*.** Genomic DNA of wildtype (WT) and mutant lines (#1) were analyzed for *AtABCG1* gene specific, T-DNA specific and actin specific amplification products. N, negative control.

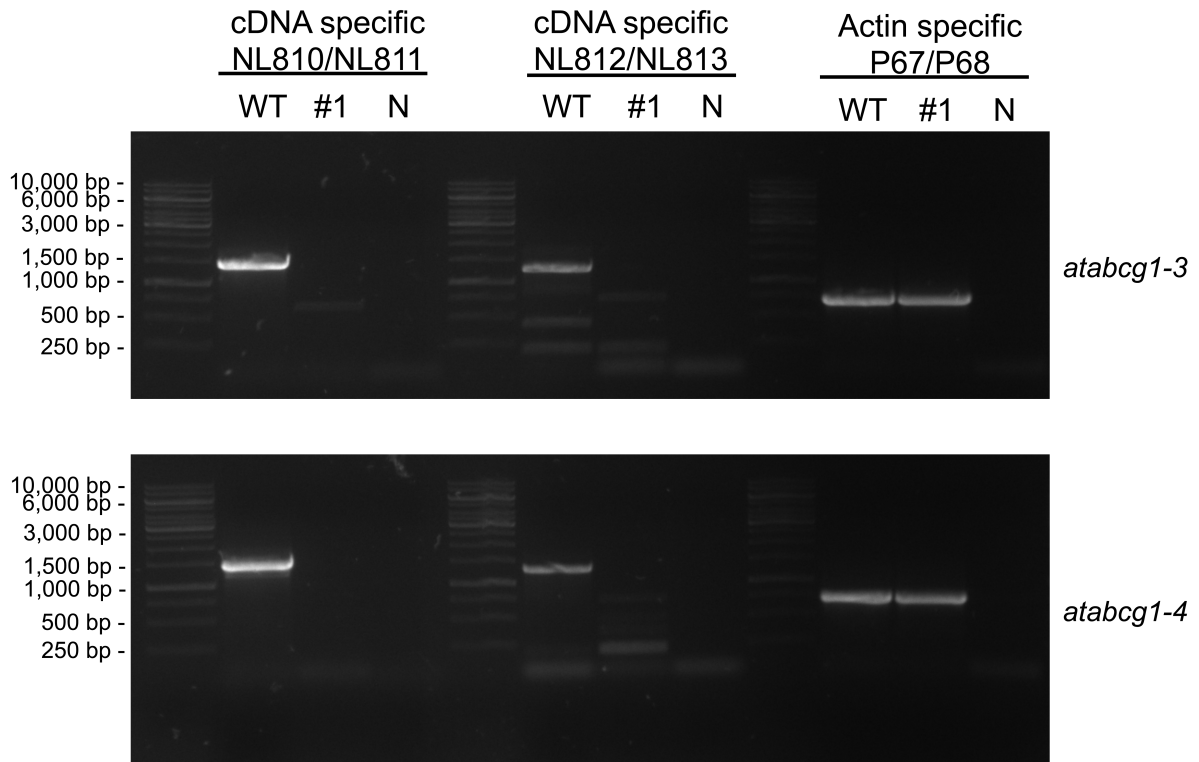

**Figure S 6: Presence of full-length AtABCG1 in T-DNA insertional *atabcg1* mutant lines.** Amplification of full-length AtABCG1 was performed from cDNA isolated from *atabcg1-3* and *atabcg1-4* lines. WT, wildtype; #1, mutant lines; N, negative control. See Table S 1 for the used primer pairs NL810/NL811, NL812/NL813 and P67/P68.

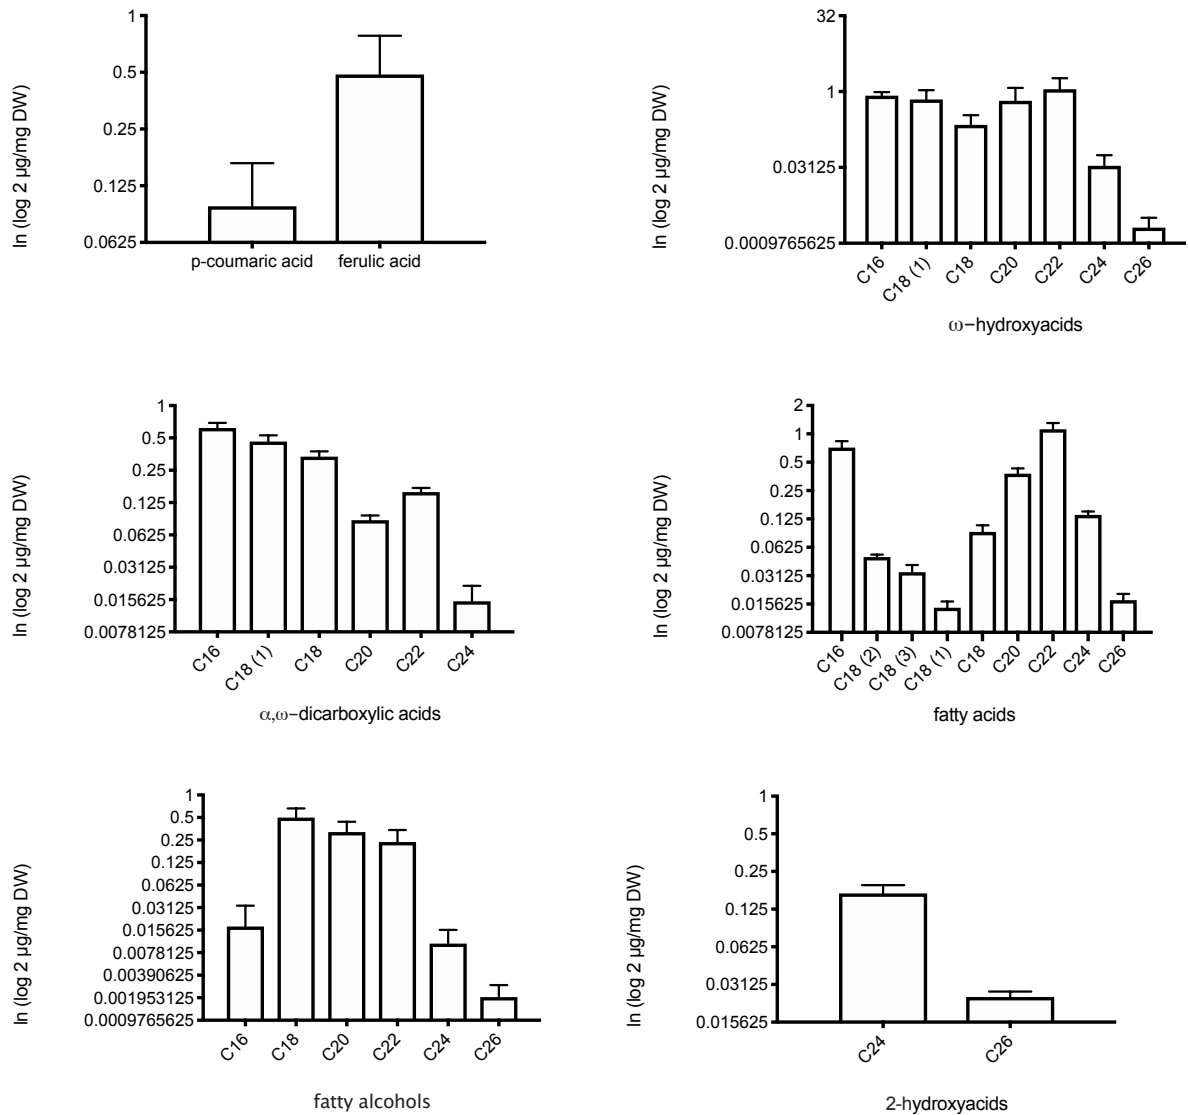

**Figure S 7: Suberin composition in *Arabidopsis* wildtype plants.** The suberin monomers were quantified using quantifier ions and retention times from Supplemental Table S 2. Data represents results of n=4 independent experiments.



**Table S 1: Primers used in this study.**

| <b>Primer</b> | <b>Application</b> | <b>DNA sequence (5' → 3')</b>       |
|---------------|--------------------|-------------------------------------|
| ABCG1-EQ fwd  | E259Q mutation     | GTTGTTCTTGGACCAGCCAACCTCCGG         |
| ABCG1-EQ rev  | E259Q mutation     | CCGGAAGTTGGCTGGTCCAAGAACAAC         |
| ABCG1-HA fwd  | H291A mutation     | GTTATCATGTCCATTGCCCAACCATCCCACAG    |
| ABCG1-HA-rev  | H291A mutation     | CTGTGGGATGGTTGGGCAATGGACATGATAAC    |
| KS3           | SAIL563B03         | GCATTGATCGTTTCGAGAGAG               |
| KS4           | SAIL563B03         | CGAGACTCCAGTTCACGAGTC               |
| KS11          | GK850E07           | GGATCCGGAGATAGCTCAAAC               |
| KS12          | GK850E07           | GCATTGATCGTTTCGAGAGAG               |
| P49           | LB SAIL line       | TAGCATCTGAATTTTCATAACCAATCTCGATACAC |
| P52           | LB GK line         | CCCATTTGGACGTGAATGTAGACAC           |
| P67           | Actin2 fwd         | TTC AATGTCCCTGCCATGTA               |
| P68           | Actin2 rev         | TGAACAATCGATGGACCTGA                |
| QP1           | ABCG1_fwd1         | GACAACACGCCATTAGGGGA                |
| QP2           | ABCG1_rev1         | ATCGTTACCCCGAGGGACTT                |
| QP3           | ABCG1_fwd2         | ACACGCCATTAGGGGAACTAC               |
| QP4           | ABCG1_rev2         | GAGGGACTTGCTCACTGTACC               |
| QP7           | ABCG1_fwd3         | AGGTGTGGTTCAGCTGAGTA                |
| QP8           | ABCG1_rev3         | AAGAACCCTAAAAGCAACTGTGA             |
| P90           | Black_fwd          | GTGAAAACCTGTTGGAGAGAAGCAA           |
| P91           | Black_rev          | TCAACTGGATACCCTTTTCGCA              |
| NL810         | ABCG1 cDNA fwd2    | TCAGAAACGCGGCTAAAACCT               |
| NL811         | ABCG1 cDNA rev2    | ACACCTTGCTGCCTCAGAAT                |
| NL812         | ABCG1 cDNA fwd3    | CATGCGTACAGTTCCATTTCG               |
| NL813         | ABCG1 cDNA rev3    | GAAGGCGAAGAACCCTAACC                |

**Table S 2: Analytical data of compounds monomers detected by GC/MS.**

| compound                                                           | quantifier ion (m/z) | characteristic ions (m/z) | retention time (min) |
|--------------------------------------------------------------------|----------------------|---------------------------|----------------------|
| p-coumaric acid                                                    | 250                  | 235, 219, 203             | 17.7                 |
| ferulic acid                                                       | 250                  | 280, 265, 219             | 20.5                 |
| <b><math>\omega</math>-hydroxyacids</b>                            |                      |                           |                      |
| C16                                                                | 311                  | 343, 159, 146, 103, 75    | 26.8                 |
| C18:1                                                              | 337                  | 384, 369, 353, 159, 146   | 29.4                 |
| C18                                                                | 339                  | 371, 159, 146, 103, 75    | 29.9                 |
| C20                                                                | 367                  | 399, 159, 146, 103, 75    | 32.9                 |
| C22                                                                | 395                  | 427, 159, 146, 103, 75    | 35.6                 |
| C24                                                                | 423                  | 455, 159, 146, 103, 75    | 38.2                 |
| C26                                                                | 451                  | 483, 159, 146, 103, 75    | 40.6                 |
| <b><math>\alpha</math>, <math>\omega</math>-dicarboxylic acids</b> |                      |                           |                      |
| C16                                                                | 98                   | 283, 112, 84              | 25.9                 |
| C18:1                                                              | 98                   | 340, 308, 276             | 28.6                 |
| C18                                                                | 98                   | 311, 112, 84              | 29.4                 |
| C20                                                                | 98                   | 339, 112, 84              | 32.2                 |
| C22                                                                | 98                   | 367, 112, 84              | 35.1                 |
| C24                                                                | 98                   | 395, 112, 84              | 37.7                 |
| <b>fatty acid</b>                                                  |                      |                           |                      |
| C16                                                                | 87                   | 270, 74, 143              | 20.5                 |
| C18:2                                                              | 87                   | 294, 263, 109, 95, 81, 67 | 23.3                 |
| C18:3                                                              | 87                   | 292, 236, 108, 95, 79, 67 | 23.4                 |
| C18:1                                                              | 87                   | 296, 264, 222, 97, 83     | 23.5                 |
| C18                                                                | 87                   | 298, 74, 143              | 24.1                 |
| C20                                                                | 87                   | 326, 74, 143              | 27.4                 |
| C22                                                                | 87                   | 354, 74, 143              | 30.6                 |
| C24                                                                | 87                   | 382, 74, 143              | 33.5                 |
| C26                                                                | 87                   | 410, 74, 143              | 36.2                 |
| <b>fatty alcohol</b>                                               |                      |                           |                      |
| C16                                                                | 299                  | 103, 75                   | 21.5                 |
| C18                                                                | 327                  | 103, 75                   | 25.0                 |
| C20                                                                | 355                  | 103, 75                   | 28.2                 |
| C22                                                                | 383                  | 103, 75                   | 31.3                 |
| C24                                                                | 411                  | 103, 75                   | 34.1                 |
| C26                                                                | 439                  | 103, 75                   | 36.8                 |
| <b>2-hydroxyacids</b>                                              |                      |                           |                      |
| C24_2OH                                                            | 411                  | 455                       | 36.2                 |
| C26_2OH                                                            | 439                  | 483                       | 38.7                 |
| <b>internal standard</b>                                           |                      |                           |                      |
| 1-pentadecanol                                                     | 285                  | 103, 75                   | 19.7                 |
| heptadecanoic acid                                                 | 87                   | 284, 84, 143              | 22.3                 |

|                              |     |                        |      |
|------------------------------|-----|------------------------|------|
| 15-hydroxypentadecanoic acid | 297 | 329, 159, 146, 103, 75 | 25.1 |
|------------------------------|-----|------------------------|------|

**Table S 3: List of used detergents in solubilization screen.** A, anionic; Z, zwitterionic; N, nonionic.

| Position | Detergent                     | cmc     | used cmc (%) | nature |
|----------|-------------------------------|---------|--------------|--------|
| A1       | Big CHAP                      | 0.25    | 1%           | N      |
| A2       | Big CHAP deoxy                | 0.12    | 1%           | N      |
| A3       | Anzergent® 3-10               | 1.2     | 2%           | Z      |
| A4       | Anameg®-7                     | 0.65    | 1%           | N      |
| A5       | Anapoe®-C10E6                 | 0.025   | 1%           | N      |
| A6       | Deoxycholic acid. sodium salt | 0.24    | 1%           | A      |
| A7       | CYGLU®-3                      | 0.86    | 2%           | N      |
| A8       | Anapoe®-C13E8                 | 0.0055  | 1%           | N      |
| A9       | Anapoe®-58                    | 0.00045 | 1%           | N      |
| A10      | Anapoe®-80                    | 0.0016  | 1%           | N      |
| A11      | 2-propyl-1-pentyl maltose     | 1.9     | 2%           | N      |
| A12      | Anapoe®-X-405                 | 0.16    | 1%           | N      |
| B1       | CYMAL®-1                      | 15      | 2%           | N      |
| B2       | CYMAL®-2                      | 5.4     | 2%           | N      |
| B3       | Fos-Choline®-12               | 0.047   | 1%           | Z      |
| B4       | Anapoe®-X-100                 | 0.015   | 1%           | N      |
| B5       | Sodium cholate                | 0.41    | 2%           | A      |
| B6       | Cyclofos™-2                   | 7.5     | 1%           | Z      |
| B7       | Anzergent® 3-14               | 0.007   | 1%           | Z      |
| B8       | Fos-Choline®-9                | 1.2     | 2%           | Z      |
| B9       | Fos-Choline®-Iso-11-6U        | 0.87    | 2%           | Z      |
| B10      | Fos-Choline®-16               | 0.00053 | 1%           | Z      |
| B11      | Cyclofos™-4                   | 0.45    | 2%           | Z      |
| B12      | Anapoe®-C10E9                 | 0.053   | 1%           | N      |
| C1       | Anapoe®-C12E8                 | 0.0048  | 1%           | N      |
| C2       | Anapoe®-35                    | 0.001   | 1%           | N      |
| C3       | Anapoe®-C12E9                 | 0.003   | 1%           | N      |
| C4       | Cyclofos™-6                   | 0.094   | 1%           | Z      |
| C5       | Anapoe®-C12E10                | 0.2     | 1%           | N      |
| C6       | Anapoe®-X-114                 | 0.011   | 1%           | N      |
| C7       | n-Nonyl-β-D-thiomaltoside     | 0.15    | 1%           | N      |
| C8       | Cyclofos™-5                   | 0.15    | 1%           | Z      |
| C9       | Anapoe®-X-305                 | -       | 1%           | N      |
| C10      | CYMAL®-3                      | 0.37    | 1%           | N      |

|            |                                                    |        |     |   |
|------------|----------------------------------------------------|--------|-----|---|
| <b>C11</b> | n-Tetradecyl-N,N-dimethylamine-N-oxide             | 0.0075 | 1%  | Z |
| <b>C12</b> | Cyclofos™-3                                        | 1.3    | 2%  | Z |
| <b>D1</b>  | Fos-Choline®-8                                     | 3.4    | 2%  | Z |
| <b>D2</b>  | Fos-Choline®-Unisat-11-10                          | 0.21   | 1%  | Z |
| <b>D3</b>  | 2,6-Dimethyl-4-heptyl-β-D-maltose                  | 1.2    | 2%  | N |
| <b>D4</b>  | Sucrose monododecanoate                            | 0.016  | 1%  | N |
| <b>D5</b>  | n-Dodecyl-α-D-maltoside                            | 0.0076 | 1%  | N |
| <b>D6</b>  | CYGLU®-4                                           | 0.058  | 2%  | N |
| <b>D7</b>  | Dimethyldecylphosphine oxide                       | 0.1    | 1%  | N |
| <b>D8</b>  | n-Dodecyl-N,N-dimethylglycine                      | 0.041  | 1%  | Z |
| <b>D9</b>  | Fos-Choline®-Iso-11                                | 0.9    | 2%  | Z |
| <b>D10</b> | Fos-Choline®-14                                    | 0.0046 | 1%  | Z |
| <b>D11</b> | Fos-Choline®-Iso-9                                 | 0.99   | 2%  | Z |
| <b>D12</b> | Fos-Choline®-15                                    | 0.0027 | 1%  | Z |
| <b>E1</b>  | Tripglu                                            | 3.6    | 2%  | N |
| <b>E2</b>  | 2-Carboxy-5-pentadecenamidopropyldimethylamine     | -      | 1%  | Z |
| <b>E3</b>  | Fos-Choline®-15                                    | 0.0027 | 1%  | Z |
| <b>E4</b>  | CYMAL®-5                                           | 0.12   | 2%  | N |
| <b>E5</b>  | n-Dodecyl-N,N-dimethylamine-N-oxide                | 0.023  | 1%  | Z |
| <b>E6</b>  | CHAPS                                              | 0.49   | 2%  | Z |
| <b>E7</b>  | MEGA-10                                            | 0.21   | 2%  | N |
| <b>E8</b>  | n-Octyl-β-D-thiomaltoside                          | 0.4    | 2%  | N |
| <b>E9</b>  | Decyl-β-D-glucoside                                | 0.07   | 1%  | N |
| <b>E10</b> | CYMAL®-5                                           | 0.12   | 2%  | N |
| <b>E11</b> | n-Undecyl-β-D-thiomaltoside                        | 0.011  | 1%  | N |
| <b>E12</b> | Anapoe®-20                                         | 0.0072 | 1%  | N |
| <b>F1</b>  | Tetraethylene glycol monoethylether(C8E4)          | 0.25   | 1%  | N |
| <b>F2</b>  | Fosfen™-9                                          | 0.014  | 1%  | Z |
| <b>F3</b>  | n-Tetradecyl-N,N-dimethylamine-N-oxide             | 0.0075 | 1%  | Z |
| <b>F4</b>  | C-DODECAFOS™                                       | 0.77   | 2%  | Z |
| <b>F5</b>  | 2-Carboxy-w-heptadecenamidopropyldimethylamine     | -      | 1%  | Z |
| <b>F6</b>  | SDS                                                |        | 10% |   |
| <b>F7</b>  | n-Heptyl-β-D-thioglucoside                         | 0.85   | 2%  | N |
| <b>F8</b>  | Negative control                                   |        |     |   |
| <b>F9</b>  | n-Decyl-α-D-maltoside                              | -      | 1%  | N |
| <b>F10</b> | LAPAO                                              | 0.052  | 2%  | Z |
| <b>F11</b> | PMAL™-8                                            | -      | 1%  | Z |
| <b>F12</b> | n-Dodecyl-β-iminodipropionic acid. monosodium salt | N/A    | 1%  | A |

|            |                                                        |          |    |   |
|------------|--------------------------------------------------------|----------|----|---|
| <b>G1</b>  | Nopol-Fos™                                             | 1.4      | 2% | Z |
| <b>G2</b>  | Tripao                                                 | 4.5      | 2% | Z |
| <b>G3</b>  | MEGA-8                                                 | 2.5      | 2% | N |
| <b>G4</b>  | PMAL™-C10                                              | -        | 1% | Z |
| <b>G5</b>  | N.N dimethyl(3-carboxy-4-dodec-5-ene) aminopropylamine | 0.0178   | 1% | Z |
| <b>G6</b>  | Cyclohexyl-n-hexyl-β-D-maltoside                       | -        | 1% | N |
| <b>G7</b>  | Fosmea®-10                                             | 0.15     | 1% | A |
| <b>G8</b>  | n-Dodecyl-β-D-maltoside                                | 0.0087   | 1% | N |
| <b>G9</b>  | NP40                                                   | 0.05-0.3 | 1% | N |
| <b>G10</b> | n-Dodecyl-β-D-maltoside                                | 0.0087   | 1% | N |
| <b>G11</b> | CHAPSO                                                 | 0.5      | 2% | Z |
| <b>G12</b> | n-Octyl-β-D-glucoside                                  | 0.53     | 2% | N |
| <b>H1</b>  | Decyltrimethylammonium chloride                        | 0.07     | 1% | C |
| <b>H2</b>  | n-Nonyl-β-D-maltoside                                  | 0.28     | 2% | N |
| <b>H3</b>  | n-Octyl-β-D-maltoside                                  | 0.89     | 2% | N |
| <b>H4</b>  | n-Tetradecyl-β-D-maltoside                             | 0.00054  | 1% | N |
| <b>H5</b>  | n-Undecyl-α-D-maltoside                                | 0.029    | 1% | N |
| <b>H6</b>  | n-Undecyl-β-D-maltoside                                | 0.029    | 1% | N |
| <b>H7</b>  | n-Nonyl-β-D-glucoside                                  | 0.2      | 1% | N |
| <b>H8</b>  | n-Dodecyl-β-D-thiomaltoside                            | 0.0026   | 1% | N |
| <b>H9</b>  | Anzergent®3-12                                         | 0.094    | 1% | Z |
| <b>H10</b> | n-Decyl-N.N-dimethylglycine                            | 0.46     | 2% | Z |
| <b>H11</b> | Sodium dodecanoyl sarcosine                            | 0.42     | 2% | A |
| <b>H12</b> | PMAL™-C-12                                             | -        | 2% | Z |
| <b>I1</b>  | Dodecyltrimethylammonium chloride                      | 0.0012   | 1% | C |
| <b>I2</b>  | Hexadecyltrimethylammonium chloride                    | 0.000102 | 1% | C |
| <b>I3</b>  | Tetradecyltrimethylammonium chloride                   | 0.0009   | 1% | C |

- 1 Czechowski, T., Stitt, M., Altmann, T., Udvardi, M. K. & Scheible, W. R. Genome-wide identification and testing of superior reference genes for transcript normalization in *Arabidopsis*. *Plant Physiol* **139**, 5-17, doi:10.1104/pp.105.063743 (2005).
- 2 Wang, Y. H. How effective is T-DNA insertional mutagenesis in *Arabidopsis*? *Journal of Biochemical Technology* **1.1** (2008).
